# Supplementary material
Source: PubMed Central journal article supplement (PMC6581595)

## Supplemental Material

### *Isolation of human CPCs*

Approximately 20-50 mg of right atrial (RA) appendage tissue routinely removed during surgical repair of congenital heart defects was collected for cell isolation. Tissue samples were transported from the Children's Healthcare of Atlanta at Egleston Hospital to the laboratory in Krebs-Ringer solution (35 mmol/L NaCl, 4.75 mmol/L KCl, 1.2 mmol/L KH<sub>2</sub>PO<sub>4</sub>, 16 mmol/L Na<sub>2</sub>HPO<sub>4</sub>, 135 mmol/L sucrose, 25 mmol/L NaHCO<sub>3</sub>, 10 mmol/L glucose, 10 mmol/L HEPES, and 30 mmol/L 2,3-butanedione monoxime, pH 7.4 with NaOH). CPCs were isolated within 4 hours of sample acquisition by magnetic bead sorting for c-Kit protein as described previously<sup>9</sup>. Samples were collected from 32 individual patients of 3 different age groups (9 neonates, 15 infants, and 8 children).

### *RNAseq*

RNA-seq analysis was conducted at the Yerkes Nonhuman Primate Genomics Core Laboratory. RNA was purified from confluent hCPCs using Trizol per manufacturer's protocol, and RNA quality was assessed using an Agilent Bioanalyzer. Libraries were prepared using the Illumina TruSeq™ mRNA stranded kit (Illumina Inc. San Diego, CA, USA) as per manufacturer's instructions. 1000 ng of total RNA was used for library preparation. ERCC (Ambion) synthetic spike-in 1 or 2 was added to each Total RNA sample and processed in parallel. The TruSeq method (high-throughput protocol) employs two rounds of poly-A based mRNA enrichment using oligo-dT magnetic beads followed by mRNA fragmentation (120-200 bp) using cations at high temperature. First and second strand cDNA synthesis was performed followed by end repair of the blunt cDNA ends and ligation of the adapters. The adapter-ligated libraries were then enriched using PCR amplification. The amplified library was validated using a DNA tape on the Agilent 4200 TapeStation and quantified using a fluorescence based method. The libraries were normalized and pooled, clustered on an Illumina cBot, and then sequenced on the Illumina HiSeq3000 system employing a single-end 101 cycle flow cell. The average read depth for the samples was 22,568,201 reads. Following de-identification of individual patients, all data were deposited in the GEO database (GSE126251).

### *CPC and MSC culture*

Human CPCs were cultured in Ham's F12 medium supplemented with 10% fetal bovine serum (FBS), 100 U/mL penicillin/streptomycin, 2 mmol/L L-glutamine, and 0.01 µg/mL basic fibroblast growth factor (bFGF). CPC conditioned media was produced by culturing confluent CPCs in media devoid of FBS and bFGF for 12 hours after first quiescing cells in media devoid of FBS and bFGF for 8 hours. MSCs were cultured in growth media containing MEM base media (Minimum Essential Medium Eagle's) supplemented with 10% FBS, 1% antibiotic-antimycotic, and 1% L-glutamine. Quiescing media for both cell types contains growth media minus serum (and FGF2 for hCPCs).

### *Proliferation assay*

Proliferation was measured using a Click-it EdU Microplate Assay (Invitrogen; Catalog no. C10214). Neonatal c-kit+ progenitor cells (CPCs) with growth media were plated at 10,000 cells per well in 96 well plates and incubated at 37°C overnight. After 24 hours, 5-Ethynyl-29-deoxyuridine (EdU) reagent was added and cells were incubated for an additional 24 hours. The

cells were then fixed and reacted with Oregon Green 488 per manufacturer's protocol. Anti-Oregon Green antibody conjugated with horseradish peroxidase was then added followed by the addition of Amplex Ultra Red substrate to produce a red fluorescent product. The absorbance of the samples was read with a BioTek Synergy 2 plate reader at 530/590 nm. In each experiment, the absorbance of each cell line was normalized by the maximum signal in that same experiment. Proliferation assay was performed N=5 times for each cell line. For an unbiased analysis, same passage number was used for each cell line at each experiment. We used different passages for different technical replicates.

#### *Migration assay*

Migration was determined using the modified Boyden chamber method. One hundred thousand MSCs were seeded in the top well of Boyden chamber (Corning; catalog no. 3422) and allowed to adhere to and migrate through the membrane. The cells were quiesced with serum free media for 24 hours while conditioned media was added to the lower chamber (assay was performed in duplicate). Conditioned media was obtained from different passages of neonatal CPCs which were quiesced for 24 hours. After 24 hours of incubation, migrated cells were detached from the bottom part of the membrane using cell dissociation solution (Trevigen; catalog no. 3455-096-05) and labeled with tracker Orange CMRA (Life Technologies; catalog no. C34551). After 1-hour incubation, cell migration was quantified by measuring CMRA fluorescence on a plate reader (BioTek Synergy 2) at 530/590 nm. The absorbance of each sample was normalized by the maximum signal quantified in the same experiment. Migration assay was done N=5 for each cell line.

#### *ELISA assay*

Conditioned media from different passages of quiesced neonatal CPCs were collected after 24 hours of incubation. The level of secreted proteins of interest (IL-1 $\alpha$ , IL-1 $\beta$ , IL-24, CXCL6, CXCL8) were quantified by specific ELISA kits (RayBiotech; Catalog no. ELH-IL1a, ELH-IL1b, ELH-IL24, ELH-GCP2, ELH-IL8 respectively). All immunosorbent measures were normalized to the maximum protein signal. ELISA was performed N=3 for each cell line.

#### *Statistical modeling and pathway analysis*

Principal component (PC) analysis and partial least squares regression (PLSR) analysis were performed using SIMCA-P software (UMetrics, now part of Sartorius Stedim Biotech; <https://umetrics.com>) that solves the PLSR problem with the nonlinear partial least squares algorithm. RNA-seq analyses were performed by aligning (paired) end reads to the reference human genome (*Homo sapiens* (PAR-masked)/hg 19) with TopHat and read depth at the level of individual genes was computed with Cufflinks on the Illumina BaseSpace. These raw intensity values were converted to counts per million, log<sub>2</sub> transformed, and normalized by several strategies to control for possible hidden sources of variability. Specifically, mRNA data between patients were normalized either to the maximum signal for each gene, or mean-centered across the full distribution of read counts. Results obtained from each normalization method were comparable, and those obtained with the mean centering are presented in Figures and discussed in the paper.

Two-way hierarchical clustering analysis of standard normalized gene expression (z-scores) for selected genes was performed using Ward's method (JMP v13, SAS Institute, Cary, NC). Volcano plots were drawn by plotting significance (-log p-value) against difference in abundance (log<sub>2</sub> scale) of the genes between good and poor c-kit<sup>+</sup> progenitor cells. Correlation of highly differentiated genes with proliferation and migration cardiac responses was analyzed with JMP statistical software, fitting Y (responses) against X (gene expression level). For

pathway analysis of gene clustering, we used Ingenuity Pathway Analysis (IPA) software. RNA expression level data were analyzed for enrichment of specific biological functions using IPA. Statistical analysis was performed using GraphPad Prism software. One-way ANOVA was used with Tukey's post-test for the comparison of multiple groups. P-values of less than 0.05 were considered significant. Data are represented as mean  $\pm$  standard error of the mean (SEM). Average accuracy between observed and predicted responses was measured by calculating the average differences between observed and predicted response among all samples. Predictability of the models was defined by calculating the R square values of regression models.

**Supplementary Table 1. List of highly correlated genes with both proliferation and migration (91 genes).**

| <b>Top genes correlated with proliferation and migration</b> |
|--------------------------------------------------------------|--------------------------------------------------------------|--------------------------------------------------------------|--------------------------------------------------------------|
| ABHD17C                                                      | HDGF                                                         | MME                                                          | SLC11A2                                                      |
| AGTRAP                                                       | HHEX                                                         | MOB3B                                                        | SLC1A3                                                       |
| ATG7                                                         | HIF3A                                                        | NFKB1                                                        | SLC35D2                                                      |
| B3GNT5                                                       | HPSE                                                         | NFKB2                                                        | SLC44A5                                                      |
| BCL2                                                         | IL1A                                                         | NFKBIA                                                       | SMOX                                                         |
| BCL6B                                                        | IL1B                                                         | NFKBIE                                                       | SOD2                                                         |
| BTF3                                                         | ISOC1                                                        | NOTCH4                                                       | TGIF1                                                        |
| C11orf84                                                     | KCNK1                                                        | NRCAM                                                        | TIE1                                                         |
| CACNB3                                                       | KHNYN                                                        | PDE4D                                                        | TMCC3                                                        |
| CHMP1B                                                       | KIAA1804                                                     | PHACTR1                                                      | TMEM132A                                                     |
| CUL1                                                         | KIFC3                                                        | PIK3CD                                                       | TMEM170A                                                     |
| CXCL1                                                        | KLF3                                                         | POU2F2                                                       | TMEM205                                                      |
| CXCL6                                                        | KLHL17                                                       | PRKD2                                                        | TMEM39B                                                      |
| CXCL8                                                        | LIMD2                                                        | PTGS2                                                        | TNIP1                                                        |
| DCLK3                                                        | LINC00473                                                    | PTPN9                                                        | TOP1MT                                                       |
| EGFL7                                                        | LINC01137                                                    | RAB3D                                                        | TRIM24                                                       |
| EIF3D                                                        | LMBR1L                                                       | RELB                                                         | TRIM8                                                        |
| ERO1B                                                        | LOC100505622                                                 | RPL4                                                         | UBALD2                                                       |
| FLI1                                                         | LOC101928100                                                 | RPS3                                                         | UCKL1                                                        |
| FMNL2                                                        | LRRC15                                                       | RPS7                                                         | VPS37C                                                       |
| FTH1                                                         | MED30                                                        | S1PR1                                                        | WTAP                                                         |
| GIPC3                                                        | MEN1                                                         | SEMA4C                                                       | ZC3H12A                                                      |
| GPR153                                                       | MLLT4                                                        | SH3BP1                                                       |                                                              |

**Supplementary Table 2. List of GOOD and POOR-quality c-kit+ progenitor cell lines.**

| <b>Patient</b> | <b>Quality</b> | <b>Patient</b> | <b>Quality</b> |
|----------------|----------------|----------------|----------------|
| Neonate 903    | GOOD           | Infant 957     | POOR           |
| Neonate 925    | GOOD           | Infant 975     | POOR           |
| Neonate 930    | GOOD           | Infant 1054    | POOR           |
| Neonate 1045   | GOOD           | Infant 1089    | POOR           |
| Neonate 1050   | GOOD           | Infant 1094    | POOR           |
| Neonate 1059   | GOOD           | Infant 1096    | POOR           |
| Neonate 1075   | GOOD           | Infant 1097    | POOR           |
| Neonate 1082   | GOOD           | Infant 1099    | POOR           |
| Neonate 1083   | GOOD           | Child 1063     | GOOD           |
| Infant 924     | GOOD           | Child 1065     | GOOD           |
| Infant 985     | GOOD           | Child 902      | POOR           |
| Infant 998     | GOOD           | Child 926      | POOR           |
| Infant 1057    | GOOD           | Child 938      | POOR           |
| Infant 1066    | GOOD           | Child 940      | POOR           |
| Infant 896     | POOR           | Child 1048     | POOR           |
| Infant 956     | POOR           | Child 1092     | POOR           |

**Supplementary Table 3. List of genes upregulated at least 2-fold or are significantly increased ( $p < 10^{-4}$ ) in GOOD vs POOR **c-kit+** progenitor cells.**

| At least 4-fold upregulated genes in Good vs Poor patients | At least 4-fold upregulated genes in Good vs Poor patients | Significantly increased genes in Good vs Poor patients | Significantly increased genes or upregulated genes at least 4-fold in Good vs Poor patients | Significantly increased genes or upregulated genes at least 4-fold in Good vs Poor patients | Significantly increased genes or upregulated genes at least 4-fold in Good vs Poor patients |
|------------------------------------------------------------|------------------------------------------------------------|--------------------------------------------------------|---------------------------------------------------------------------------------------------|---------------------------------------------------------------------------------------------|---------------------------------------------------------------------------------------------|
| C3                                                         | IL1B                                                       | IGF2BP2                                                | C3                                                                                          | IL1A                                                                                        | S1PR1                                                                                       |
| CADPS2                                                     | IL24                                                       | KIAA1804                                               | CADPS2                                                                                      | IL1B                                                                                        | SLC35D2                                                                                     |
| CARD11                                                     | IRAK3                                                      | MCB                                                    | CARD11                                                                                      | IL24                                                                                        | SLC6A15                                                                                     |
| CSF2                                                       | KCNK1                                                      | PTBP1                                                  | CSF2                                                                                        | IRAK3                                                                                       | SLC7A2                                                                                      |
| CXCL1                                                      | KIAA1804                                                   | RBM10                                                  | CXCL1                                                                                       | KCNK1                                                                                       | STARD10                                                                                     |
| CXCL2                                                      | LAMP3                                                      | RPL14                                                  | CXCL2                                                                                       | KIAA1804                                                                                    | STRN4                                                                                       |
| CXCL6                                                      | LOC100505622                                               | SLC35D2                                                | CXCL6                                                                                       | LAMP3                                                                                       | TFPI2                                                                                       |
| CXCL8                                                      | MDF1                                                       | STARD10                                                | CXCL8                                                                                       | LOC100505622                                                                                | TIE1                                                                                        |
| DSC2                                                       | MME                                                        | STRN4                                                  | DSC2                                                                                        | MDF1                                                                                        |                                                                                             |
| EPB41L3                                                    | NRCAM                                                      |                                                        | EPB41L3                                                                                     | MICB                                                                                        |                                                                                             |
| FAM163A                                                    | PDZK1IP1                                                   |                                                        | FAM163A                                                                                     | MME                                                                                         |                                                                                             |
| FBN2                                                       | POU2F2                                                     |                                                        | FBN2                                                                                        | NRCAM                                                                                       |                                                                                             |
| GPR4                                                       | S1PR1                                                      |                                                        | GPR4                                                                                        | PDZK1IP1                                                                                    |                                                                                             |
| HIF3A                                                      | SLC6A15                                                    |                                                        | HIF3A                                                                                       | POU2F2                                                                                      |                                                                                             |
| HPSE                                                       | SLC7A2                                                     |                                                        | HPSE                                                                                        | PTBP1                                                                                       |                                                                                             |
| HSD11B1                                                    | TFPI2                                                      |                                                        | HSD11B1                                                                                     | RBM10                                                                                       |                                                                                             |
| IL1A                                                       | TIE1                                                       |                                                        | IGF2BP2                                                                                     | RPL14                                                                                       |                                                                                             |

**Supplementary Table 4. List of canonical signaling pathways of highly differentiated genes (42 genes) that are associated with cardiac and immune responses.**

| <b>Canonical Pathways</b>                                                              | <b>-log (p-value)</b> |
|----------------------------------------------------------------------------------------|-----------------------|
| Granulocyte Adhesion and Diapedesis (Inflammatory Response)                            | 8.17                  |
| Agranulocyte Adhesion and Diapedesis (Macrophage, Lymphocyte, Monocyte)                | 6.72                  |
| Role of Cytokines in Mediating Communication between Immune Cells (Immune Response)    | 5.98                  |
| IL-8 Signaling (Innate Immunity)                                                       | 5.17                  |
| Cytokine Production in Macrophages and T Helper (Immune Response)                      | 4.49                  |
| TREM1 Signaling (Inflammatory Response)                                                | 3.97                  |
| HMGB1 Signaling (Transcriptional Regulation)                                           | 3.92                  |
| Communication between Innate and Adaptive Immune Cells (Immune Response)               | 3.61                  |
| Complement System (Immune Response)                                                    | 3.57                  |
| Fcγ Receptor-mediated Phagocytosis in Macrophages and Monocytes (Immune Response)      | 3.5                   |
| Hematopoiesis from Pluripotent Stem Cells (Blood Cell Formation)                       | 3.37                  |
| STAT3 Pathway (Cellular Growth and Apoptosis, Immune Response Factor)                  | 3.33                  |
| LXR/RXR Activation (Transcription Factor)                                              | 3.06                  |
| Integrin Signaling (Cell Adhesion, Migration, Immune Response)                         | 3.05                  |
| Atherosclerosis Signaling                                                              | 3.02                  |
| Natural Killer Cell Signaling (Immune Response)                                        | 3                     |
| Glucocorticoid Receptor Signaling (Immune Response Regulator, Fetal Heart Development) | 2.9                   |
| Netrin Signaling (Angiogenesis)                                                        | 2.81                  |
| Agrin Interactions at Neuromuscular Junction (Cardiac Cell Regeneration)               | 2.67                  |

|                                                                                        |      |
|----------------------------------------------------------------------------------------|------|
| Ephrin B Signaling                                                                     | 2.67 |
| Toll-like Receptor Signaling                                                           | 2.63 |
| IL-15 Signaling (Immune Response)                                                      | 2.52 |
| Acute Phase Response Signaling (Immune Response)                                       | 2.48 |
| Ephrin Receptor Signaling                                                              | 2.46 |
| Toll-like Receptor Signaling                                                           | 2.63 |
| IL-15 Signaling (Immune Response)                                                      | 2.52 |
| Acute Phase Response Signaling (Immune Response)                                       | 2.48 |
| Ephrin Receptor Signaling                                                              | 2.46 |
| NF- $\kappa$ B Signaling                                                               | 2.4  |
| ERK/MAPK Signaling (Cell Cycle and Proliferation)                                      | 2.25 |
| Leukocyte Extravasation Signaling (Immune Response)                                    | 2.23 |
| SAPK/JNK Signaling (Proliferation, Apoptosis)                                          | 2.18 |
| p38 MAPK Signaling (Immune Response)                                                   | 2.06 |
| PTEN Signaling (Cell Proliferation)                                                    | 2.02 |
| IL-6 Signaling (Immune Response)                                                       | 1.93 |
| Neuroinflammation Signaling Pathway                                                    | 1.67 |
| IL-10 Signaling (Immune Response)                                                      | 1.61 |
| MSP-RON Signaling Pathway (macrophage activity, wound healing)                         | 1.58 |
| Dendritic Cell Maturation (Immune Response)                                            | 1.57 |
| B Cell Receptor Signaling (Immune Response)                                            | 1.54 |
| GM-CSF Signaling (Immune Response)                                                     | 1.5  |
| Regulation of IL-2 Expression in Activated and Anergic T Lymphocytes (Immune Response) | 1.45 |
| IL-3 Signaling (Immune Response)                                                       | 1.41 |



|                                                                              |      |
|------------------------------------------------------------------------------|------|
| Crosstalk between Dendritic Cells and Natural Killer Cells (Immune Response) | 1.41 |
| IL-17 Signaling (Immune Response)                                            | 1.39 |
| Hematopoiesis from Multipotent Stem Cells (Regeneration)                     | 1.38 |
| IL-1 Signaling (Immune Response)                                             | 1.38 |
| PRAR Signaling (Proliferation)                                               | 1.33 |

**Supplementary Table 5. Canonical pathway analysis.**

Ingenuity pathways analysis (IPA) was used to determine top canonical pathways for the overlapping genes between original top 300 genes and the 42 highly differentiated genes. Pathway analysis demonstrated that these genes are involved in pathways such as cardiovascular system development and function, immune response pathways and networks, and cellular growth and proliferation. The two sets of genes share several same canonical pathways.

| <b>Canonical Pathways</b>                    | <b>-log (p-value)</b> |
|----------------------------------------------|-----------------------|
| Granulocyte Adhesion and Diapedesis          | 7.47                  |
| Agranulocyte Adhesion and Diapedesis         | 5.91                  |
| IL-8 Signaling                               | 4.33                  |
| Complement System                            | 4.31                  |
| Integrin Signaling                           | 4.23                  |
| LXR/RXR Activation                           | 4.02                  |
| FXR/RXR Activation                           | 3.97                  |
| Natural Killer Cell Signaling                | 3.96                  |
| Netrin Signaling                             | 3.54                  |
| Role of IL-17A in Arthritis                  | 3.46                  |
| Acute Phase Response Signaling               | 3.41                  |
| Agrin Interactions at Neuromuscular Junction | 3.39                  |
| Ephrin B Signaling                           | 3.39                  |
| Ephrin Receptor Signaling                    | 3.39                  |

|                                                                                                       |      |
|-------------------------------------------------------------------------------------------------------|------|
| Differential Regulation of Cytokine Production in Macrophages and T Helper Cells by IL-17A and IL-17F | 3.24 |
| Regulation of Actin-based Motility by Rho                                                             | 3.18 |
| ERK/MAPK Signaling                                                                                    | 3.17 |
| Fcγ Receptor-mediated Phagocytosis in Macrophages and Monocytes                                       | 3.08 |
| STAT3 Pathway                                                                                         | 2.96 |
| SAPK/JNK Signaling                                                                                    | 2.88 |
| Atherosclerosis Signaling                                                                             | 2.72 |
| Fc Epsilon RI Signaling                                                                               | 2.71 |
| PTEN Signaling                                                                                        | 2.71 |
| HMGB1 Signaling                                                                                       | 2.6  |
| PKCθ Signaling in T Lymphocytes                                                                       | 2.41 |
| Glucocorticoid Receptor Signaling                                                                     | 2.34 |
| Role of Cytokines in Mediating Communication between Immune Cells                                     | 2.32 |
| B Cell Receptor Signaling                                                                             | 2.2  |
| Leukocyte Extravasation Signaling                                                                     | 2.11 |
| IL-10 Signaling                                                                                       | 2.08 |
| TREM1 Signaling                                                                                       | 2.07 |
| MSP-RON Signaling Pathway                                                                             | 2.05 |
| Toll-like Receptor Signaling                                                                          | 2.01 |

**Supplementary Figure S1.** Proliferation and migration reparative ability of child hCPCs are correlated. Responses are mean-centered.

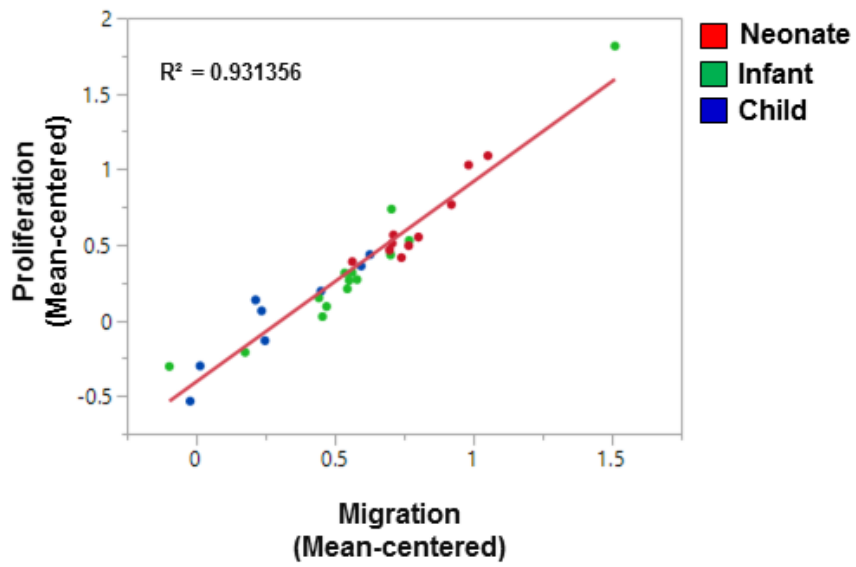

**Supplementary Figure S2. Correlated genes with proliferation and migration functions.** Correlation between proliferation and migration functions and the selected differentially upregulated inflammatory genes that are involved in development and growth. Signals and responses are mean-centered.

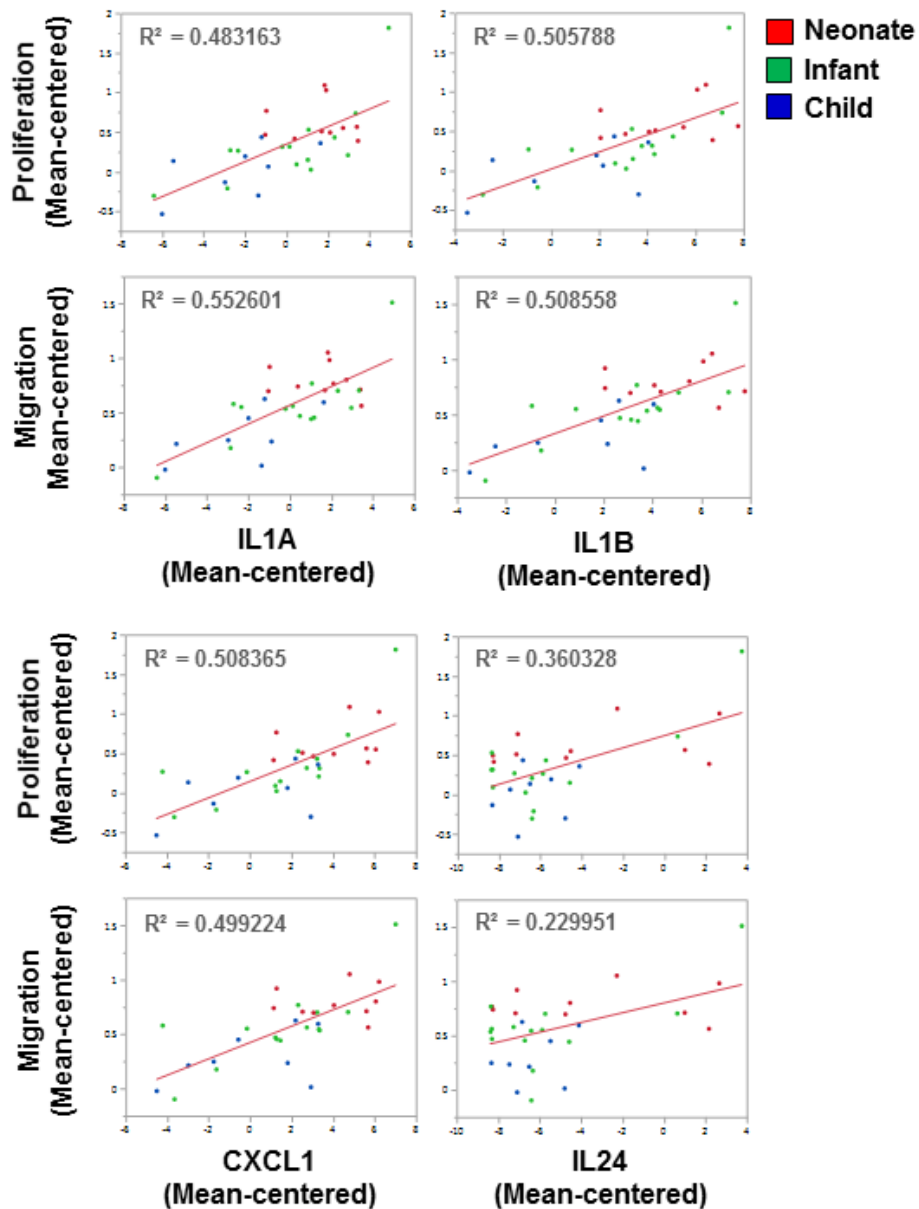

**Supplementary Figure S3.** Regression analysis of observed proliferation and migration responses with protein expression levels of CXCL6 and CXCL8 measured by ELISA in neonatal patients. Observed proliferation or migration responses for each neonate patient were plotted against CXCL6 (A,B) or CXCL8 (C) protein expression levels. Correlation between proliferation responses measured in neonatal patients did not show strong correlation with either CXCL6 or CXCL8 protein expression levels. Correlation between neonatal migration responses and CXCL6 expression level was low .

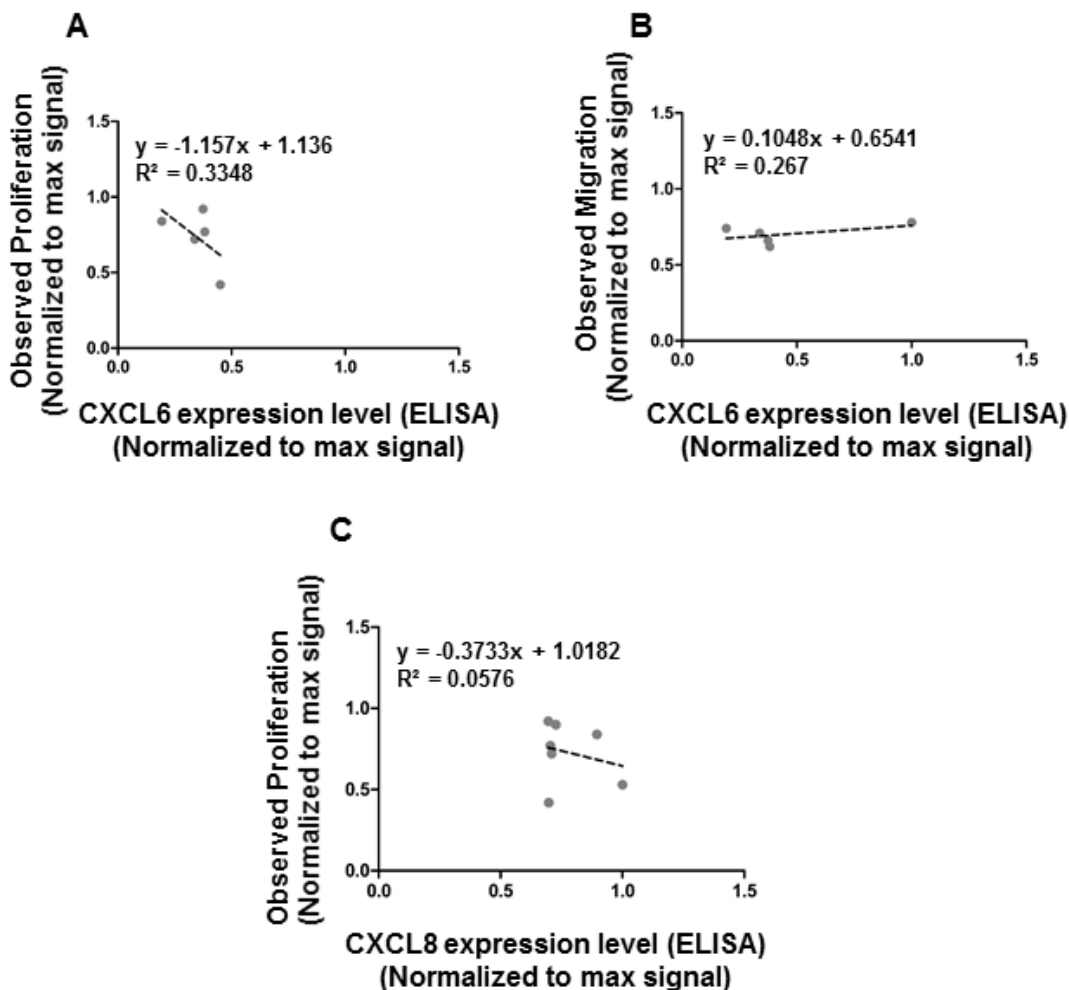

Supplement: NIHMS1530606-supplement-002403_-_Supplemental_Material.pdf [file NIHMS1530606-supplement-002403_-_Supplemental_Material.pdf]
